# Supplementary material for: A survey of retracted articles in the three high-impact journals
Source: Research Square preprint supplement (doi:10.21203/rs.3.rs-1558719/v1), 2022-04-20
Supplement: Supplementary file 1 [file 59be89ae5e84ae169a4111e9.pdf]

**Additional file 2 Number of retractions based on country of origin**

|                          | <b>JAMA, n (%)</b> | <b>Lancet, n (%)</b> | <b>NEJM, n (%)</b> | <b>Total, n (%)</b> |
|--------------------------|--------------------|----------------------|--------------------|---------------------|
| <b>Country of origin</b> |                    |                      |                    |                     |
| United States            | 12 (60.0)          | 7 (22.6)             | 10 (38.5)          | 29 (37.7)           |
| United Kingdom           | -                  | 6 (19.4)             | 3 (11.5)           | 9 (11.7)            |
| China                    | 1 (5.0)            | 2 (6.5)              | 2 (7.7)            | 5 (6.5)             |
| Canada                   | 1 (5.0)            | 2 (6.5)              | 1 (3.8)            | 4 (5.2)             |
| Japan                    | 1 (5.0)            | 2 (6.5)              | 1 (3.8)            | 4 (5.2)             |
| Australia                | 2 (10.0)           | -                    | 1 (3.8)            | 3 (3.9)             |
| France                   | -                  | 3 (9.7)              | -                  | 3 (3.9)             |
| Germany                  | -                  | 2 (6.5)              | 1 (3.8)            | 3 (3.9)             |
| India                    | 1 (5.0)            | -                    | 2 (7.7)            | 3 (3.9)             |
| Norway                   | -                  | 1 (3.2)              | 2 (7.7)            | 3 (3.9)             |
| Spain                    | -                  | 2 (6.5)              | 1 (3.8)            | 3 (3.9)             |
| Austria                  | -                  | 1 (3.2)              | -                  | 1 (1.3)             |
| Brazil                   | 1 (5.0)            | -                    | -                  | 1 (1.3)             |
| Italy                    | -                  | -                    | 1 (3.8)            | 1 (1.3)             |
| Netherlands              | 1 (5.0)            | -                    | -                  | 1 (1.3)             |
| Pakistan                 | -                  | -                    | 1 (3.8)            | 1 (1.3)             |
| Sweden                   | -                  | 1 (3.2)              | -                  | 1 (1.3)             |
| Switzerland              | -                  | 1 (3.2)              | -                  | 1 (1.3)             |
| Turkey                   | -                  | 1 (3.2)              | -                  | 1 (1.3)             |
