# Supplementary material for: A survey of retracted articles in the three high-impact journals
Source: Research Square preprint supplement (doi:10.21203/rs.3.rs-1558719/v1), 2022-04-20
Supplement: Supplementary file 2 [file a95c4648ce05780bb80836a7.pdf]

## Additional file 1 Characteristics of the retracted articles

| Characteristic                                        | N (%)          |               |               |              |
|-------------------------------------------------------|----------------|---------------|---------------|--------------|
|                                                       | JAMA (n=20)    | Lancet (n=31) | NEJM (n=26)   | Total (n=77) |
| <b>Article type</b>                                   |                |               |               |              |
| Clinical Study                                        | 6 (30.0)       | 12 (38.7)     | 9 (34.6)      | 27 (35.1)    |
| Research Article                                      | 11 (55.0)      | 9 (29.0)      | 7 (26.9)      | 27 (35.1)    |
| Letter                                                | 2 (10.0)       | 2 (6.5)       | 6 (23.1)      | 10 (13.0)    |
| Case Report                                           | -              | 2 (6.5)       | 3 (11.5)      | 5 (6.5)      |
| Commentary/Editorial                                  | 1 (5.0)        | 2 (6.5)       | 1 (3.8)       | 4 (5.2)      |
| Meta-Analysis                                         | -              | 2 (6.5)       | -             | 2 (2.6)      |
| Review Article                                        | -              | 2 (6.5)       | -             | 2 (2.6)      |
| <b>Authors with at least two retraction</b>           | 1 (5.0)        | 1 (3.2)       | 2 (7.7)       | 4 (5.2)      |
| <b>Retraction in the first year after publication</b> | 4 (20%)        | 16 (51.6%)    | 10 (38.5%)    | 30 (39.0%)   |
| <b>Time to retraction, days, (range)</b>              | 813 (154-4907) | 266 (2-8474)  | 735 (18-2716) | 651 (2-8474) |
| <b>Times cited</b>                                    | 77 (2-214)     | 91 (0-1499)   | 48 (1-2677)   | 79 (0-2677)  |
| <b>Retraction after 2000</b>                          | 19 (95.0)      | 23 (74.2)     | 18 (69.2)     | 60 (77.9)    |
| <b>Retraction after 2010</b>                          | 17 (85.0)      | 18 (58.1)     | 9 (34.6)      | 44 (57.1)    |
